# Supplementary material
Source: PubMed Central journal article supplement (PMC406460)

**A**

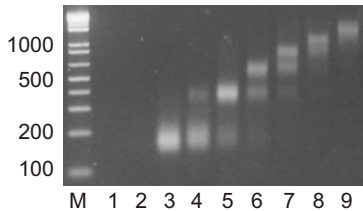

**B**

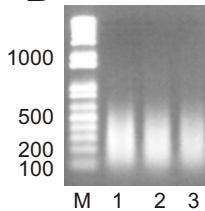

Supplement: pnas_101_18_7028__2.pdf [file pnas_101_18_7028__2.pdf]
